# Supplementary material
Source: publisher site journal article supplement (https://www.dovepress.com/article/234823)
Supplement: Supplementary file 1 [file get_supplementary_file.php]

# **Supplementary material**

Supplementary Table 1 Summary of single- versus multiple-inhaler studies included in the systematic review

| Study | Study type | Patients, N | Comparison of interest | Outcomes | NCT number |
| --- | --- | --- | --- | --- | --- |
| Asthma: observational studies (n=12) | | | | | |
| Brüggenjürgen, 201033 | Observational, retrospective, using data from a RCT | 645 | BDP, FOR | Cost, cost-effectiveness, hospital and physician visits |  |
| Chan, 200721 | Observational, retrospective, using an administrative database | 2426 | FP, SAL | ER and hospital visits, RMU, refill |  |
| Elkout, 201034 | Retrospective, observational prescription data | 10,454 | ICS, LABA | RMUa |  |
| Elkout, 201220 | Retrospective, observational prescription data | 3172 | ICS, LABA | RMU,a adherencea |  |
| Latry, 200824 | Observational, cohort study, administrative data of patients using anti-inflammatory asthma controller medication | 12,502 | ICS, LABA | Persistence,a adherence, effectiveness |  |
| Marceau, 200619 | Retrospective observational, matched cohort study | 5118 | ICS, LABA | Number of moderate-to-severe exacerbations;a physician,a ER,a and hospital visits;a adherence,a persistencea |  |
| Mohan, 200650 | Observational, 1-week prospective cohort | 27 | IPR, SAL | FEV1, PEF, FVC |  |
| O’Connor, 200523 | Observational, retrospective cohort, from administrative claims | 2414 | FP, SAL | ER visits,a hospital costsa |  |
| Rosenhall, 200322 | Observational, prospective using data from previous RCT | 320 | BUD, FOR | Direct costsa and indirect costs |  |
| Stallberg, 200835 | Prospective clinical trial in a real-life setting | 1776 | BUD, FOR | Number of exacerbations, direct and indirect costs, adherencea |  |
| Stempel, 200517 | Observational, retrospective | 3503 | FP, SAL | Adherence,a refilla |  |
| Stoloff, 200418 | Observational, retrospective | 2511 | FP, SAL | Adherence,a refilla |  |
| COPD: observational studies (n=4) | | | | | |
| Benayoun, 200139 | Retrospective observational cohort; prescriptions and hospitalization database | 1052 | IPR, β-agonist | Bronchodilator use, other respiratory medication use, antibiotic use, bronchodilator costsa |  |
| Chrischilles, 200229 | Retrospective observational cohort; health claims data | 1086 | IPR, ALB | Hospitalizations,a healthcare chargesa |  |
| York, 200730 | Observational, population-based, retrospective cohort; managed care claims database | 1531 | IPR, ALB | 12-month total expenditure on medical visits, labs, IP services including ER visits and pharmacy,a compliance |  |
| Yu, 201138 | Observational, matched pair, retrospective claims data | 23,494 | LABA, ICS | IP visitsa and OP healthcare costs, pharmacy/medical costsa |  |
| Asthma: RCTs (n=18) | | | | | |
| Aubier, 199925 | RCT  Equivalence | 503 | SAL, FP | FEV1, PEF, day/night symptoms, RMU-free days, compliance | NCT01484210 |
| Bodzenta-Lukaszyk, 201142 | RCT  Non-inferiority | 620 | FP, FOR | FEV1, PEF, number of exacerbations, asthma  symptom score | NCT00734318 |
| Bodzenta-Lukaszyk, 201343 | RCT  Non-inferiority | 210 | FP, FOR | FEV1, PEF, number of severe exacerbations, RMU, asthma symptom score, sleep disturbance score, compliance | NCT00563056 |
| Chapman, 199947 | RCT  Equivalence | 371 | SAL, FP | FEV1, PEF, day/night  symptom scores |  |
| Chawes, 201352 | RCT  PK-focused | 23 | BDP, FOR | PK parameters, PEF | NCT01848769 |
| Chervinsky, 200836 | RCT  PROs | 596 | BUD, FOR | Lung function, daily symptom score, RMU |  |
| Hochhaus, 201153 | RCT  Single-dose exposure study | 64 | FP, FOR | FEV1, PEF, FVC |  |
| Huchon, 200944 | RCT  Non-inferiority | 645 | BDP, FOR | FEV1, PEF, number of exacerbations, symptom-free daysa | NCT00476268 |
| Jenkins, 200645 | RCT  Double-blind, double-dummy | 456 | BUD, FOR | PEF, number of mild exacerbation days, asthma symptom score, RMU-free days |  |
| Kawai, 200751 | RCT  Equivalence | 35 | FP, SAL | FEV1 | NCT02094937 |
| Miller, 200854 | RCT  Relative dose potency ratio, ANCOVA | 201 | BUD, FOR | FEV1 |  |
| Noonan, 200648 | RCT  Double-blind, double-dummy, placebo-controlled | 596 | BUD, FOR | FEV1, PEF, day/night  symptom score |  |
| Papi, 200749 | RCT  Equivalence | 455 | BDP, ALB | PEF, day symptom score, compliance | NCT00382889 |
| Perrin, 201026 | RCT  Focus on adherence | 111 | FP, SAL | FEV1, ACQ, adherence |  |
| Rosenhall, 200228 | RCT  Open, parallel-group | 586 | BUD, FOR | FEV1, FVC, OCS use, ACQ |  |
| Rosenhall, 200337 | RCT  Open, parallel-group | 321 | BUD, FOR | FEV1, FVC, OCS use, ACQ, AQLQ |  |
| van den Berg, 200046 | RCT  Equivalence | 257 | FP, SAL | PEF, day symptom score, compliance |  |
| Zetterstrom, 200127 | RCT  Active-controlled, parallel-group | 362 | BUD, FOR | PEF, number of exacerbations, RMU, asthma symptom score, adherence |  |
| COPD: RCTs (n=4) | | | | | |
| Dahl, 201340 | RCT  Non-inferiority | 193 | IND, GLY | FEV1, RMU, symptom score | NCT01529632 |
| Ferguson, 201332 | RCT | 470 | IPR, ALB | PASAPQ,a time to exacerbation, persistence | NCT01019694 |
| Hagedorn, 201331 | RCT | 213 | SAL, FP | Rate of exacerbations, direct costs, lung function | NCT00527826 |
| Tashkin, 200841 | RCT | 1704 | BUD, FOR | FEV1, PEF, IC, symptom scores, dyspnea, SGRQ | NCT00206154 |

Note: aA statistically significant difference was reported between single-inhaler and multiple-inhaler treatments for this outcome.

Abbreviations: ACQ, Asthma Control Questionnaire; ALB, albuterol; ANCOVA, analysis of covariance; AQLQ, Asthma Quality of Life Questionnaire; BDP, beclomethasone dipropionate; BUD, budesonide; COPD, chronic obstructive pulmonary disease; ER, emergency room; FEV1, forced expiratory volume in 1 second; FOR, formoterol; FP, fluticasone propionate; FVC, forced vital capacity; GLY, glycopyrronium; IC, inspiratory capacity; ICS, inhaled corticosteroids; IND, indacaterol; IP, inpatient; IPR, ipratropium; LABA, long-acting β2 agonist; NCT, national clinical trial; OCS, oral corticosteroid; OP, outpatient; PASAPQ, Patient Satisfaction and Preference Questionnaire; PEF, peak expiratory flow; PK, pharmacokinetic(s); PRO, patient-reported outcome; RCT, randomized controlled trial; RMU, rescue medication use; SAL, salmeterol; SGRQ, St. George’s Respiratory Questionnaire.
